# Supplementary material for: Kinetics-mediated assembly assisted precise synthesis of magnetic ordered mesoporous carbon nanospheres for ultra-efficient electromagnetic wave absorption
Source: Royal Society of Chemistry journal article supplement (doi:10.1039/d3ta04087a), 2023-01-01
Supplement: d3ta04087a1.pdf [file d3ta04087a1.pdf]

# Kinetics-Mediated Assembly Assisted Precise Synthesis of Magnetic Ordered Mesoporous Carbon Nanospheres for Ultra-Efficient Electromagnetic Wave Absorption

Mengmeng Wei,<sup>a, b</sup> Kai Liu,<sup>c</sup> Qingyan Li,<sup>a</sup> Hongwei Zhang,<sup>a</sup> Guoxian Zhang,<sup>a</sup> Qiuyu Zhang<sup>\*a, b</sup>  
and Baoliang Zhang<sup>\*a, d</sup>

<sup>a</sup> School of Chemistry and Chemical Engineering, Northwestern Polytechnical University, Xi'an, 710072, China.

<sup>b</sup> Xi'an Key Laboratory of Functional Organic Porous Materials, Northwestern Polytechnical University, Xi'an, 710129, China.

<sup>c</sup> School of Materials Science and Engineering, Peking University, Beijing 100871, China.

<sup>d</sup> Shaanxi Engineering and Research Center for Functional Polymers on Adsorption and Separation, Sunresins New Materials Co. Ltd., Xi'an, 710072, China.

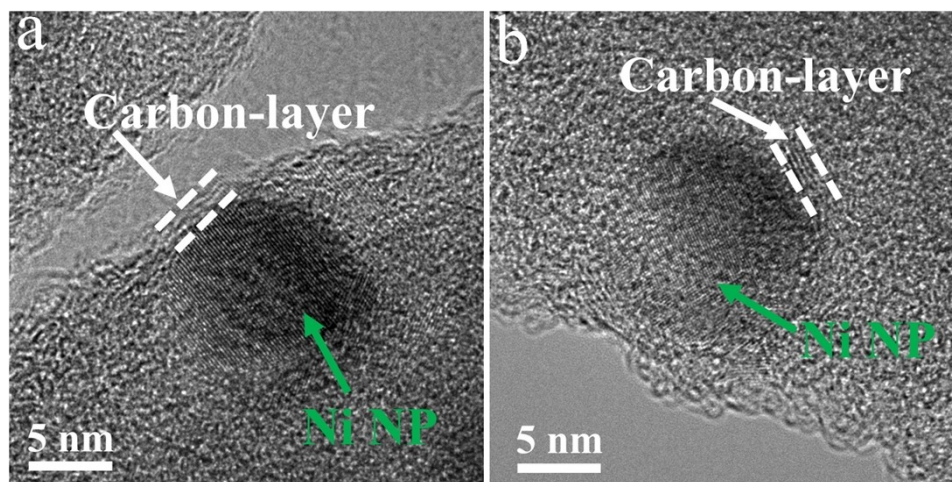

**Figure S1.** High-resolution TEM images Ni/OMCN-D (a) and Ni/OMCN-S (b).

---

\* Corresponding author, Northwestern Polytechnical University, Youyi Road 127#, Xi'an (710072), China. Email: qyzhang@nwpu.edu.cn; blzhang@nwpu.edu.cn

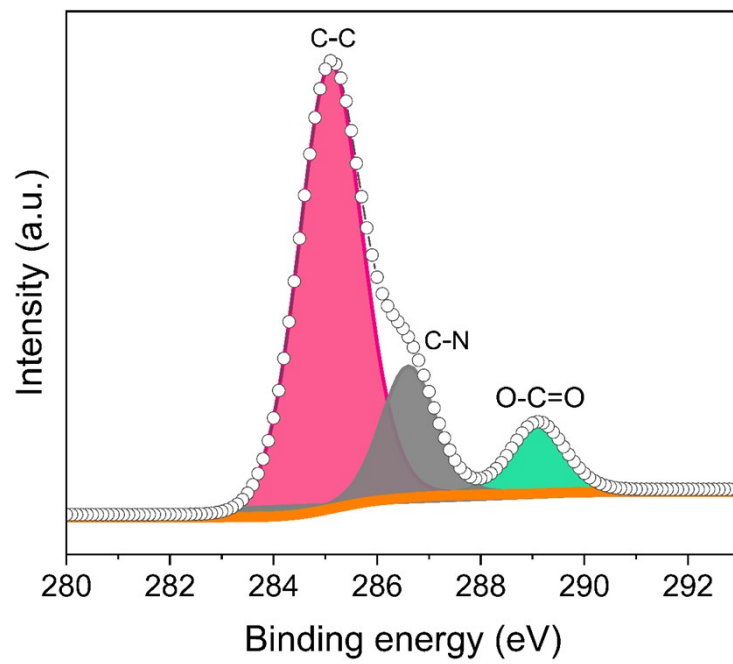

**Figure S2.** C 1s spectrum of Ni/OMCN-D.

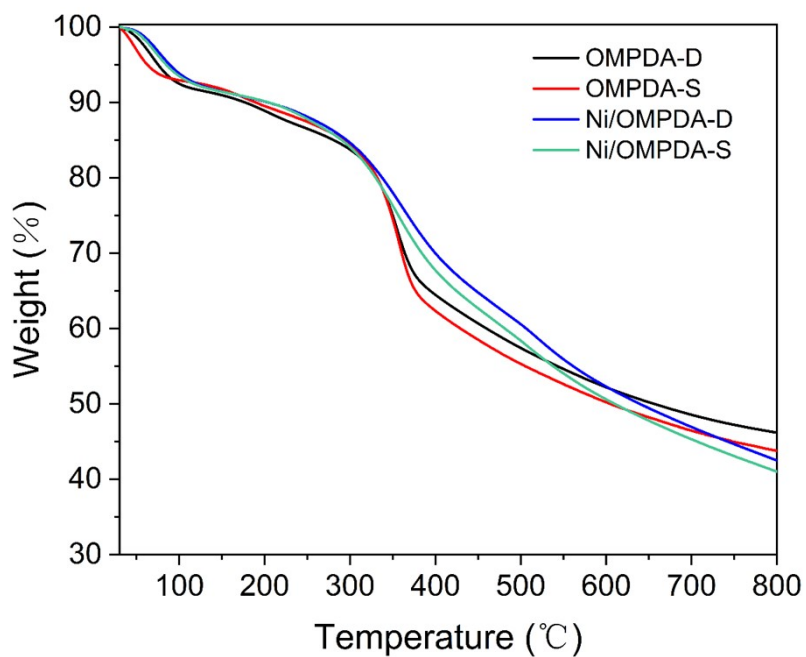

**Figure S3.** TGA curves of the samples under nitrogen atmosphere.

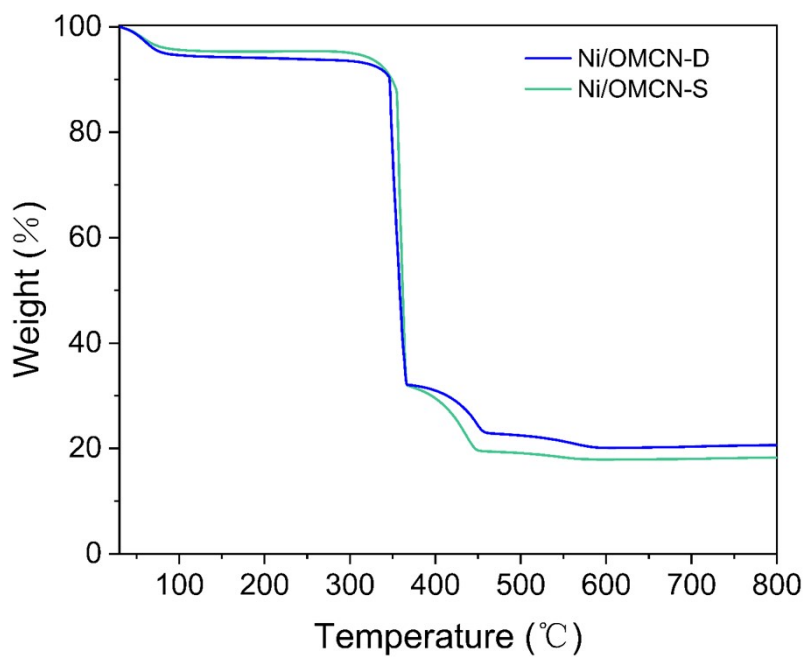

**Figure S4.** TGA curves of Ni/OMCN-D and Ni/OMCN-S under air atmosphere.

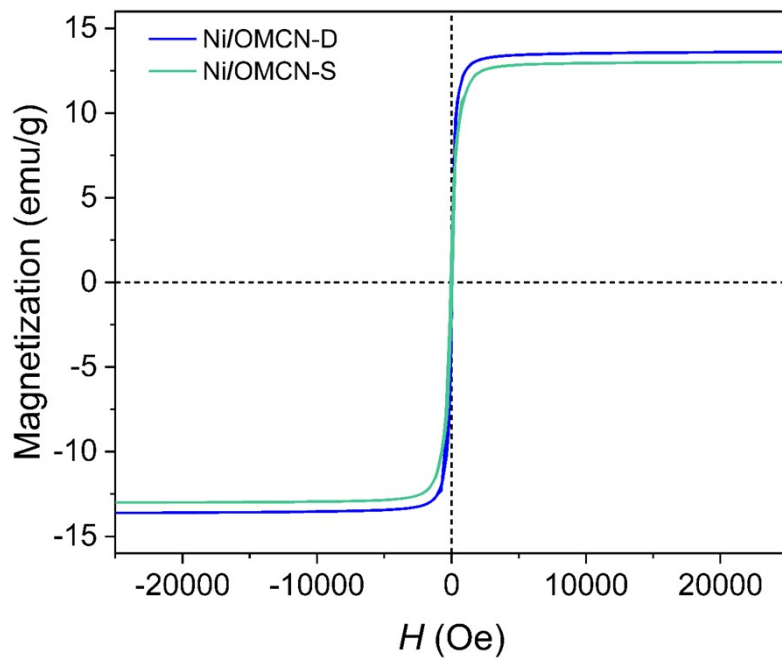

**Figure S5.** Room-temperature hysteresis loops of Ni/OMCN-D and Ni/OMCN-S.

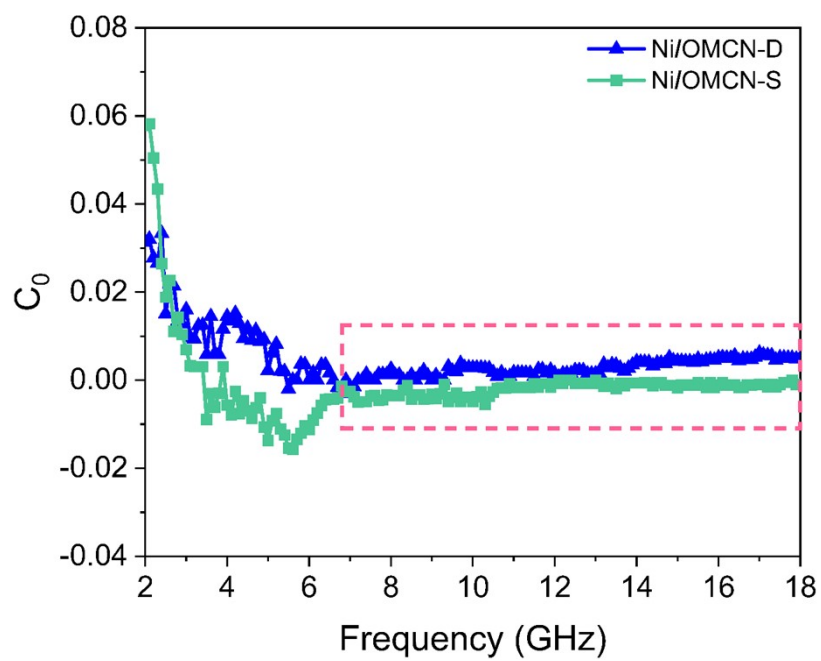

**Figure S6.**  $C_0$ - $f$  curves of Ni/OMCN-D and Ni/OMCN-S.

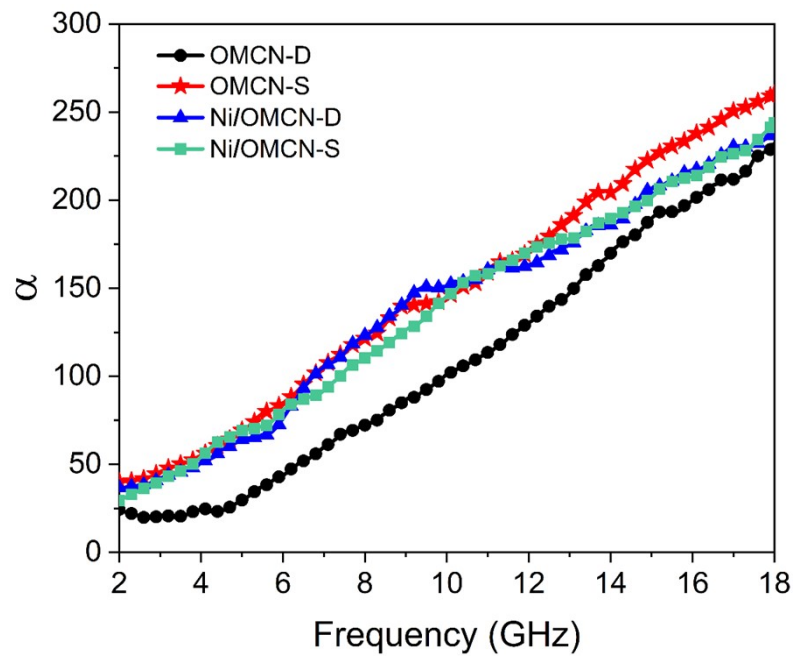

**Figure S7.** Attenuation constant of the samples.

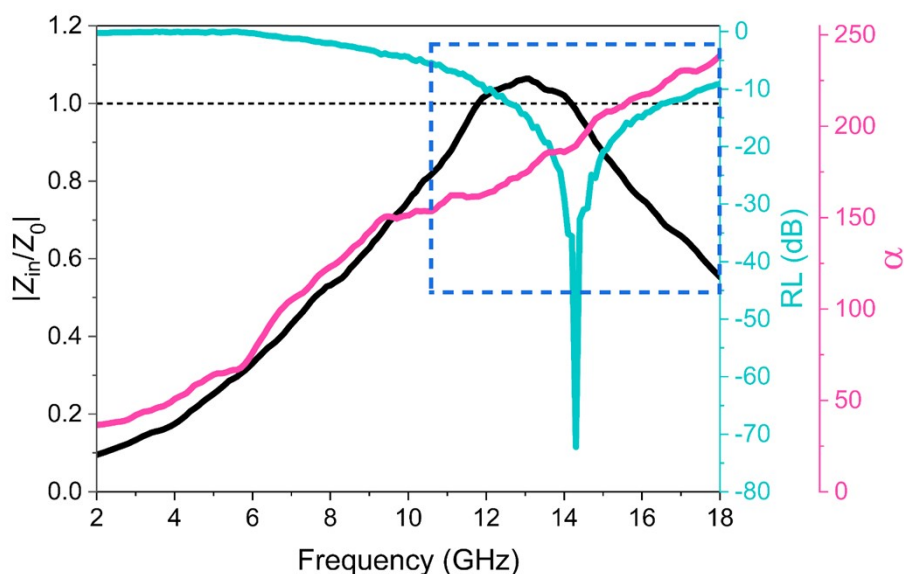

**Figure S8.** The frequency-dependent RL,  $|Z_{in}/Z_0|$  and  $\alpha$  values of the Ni/OMCN-D composite at the 2.0 mm thickness.

Ni/OMCN-D was taken as an example to reveal the intrinsic relationships between impedance matching, dissipation capability and EMWA performance. The EMWA properties of Ni/OMCN-D at 2.0 mm were analyzed by examining the variation in RL,  $|Z_{in}/Z_0|$  and  $\alpha$  as a function of frequency (Figure S8). When the frequency was 18 GHz,  $\alpha$  reach the maximum value of 239, while the corresponding RL intensity decreased to the lowest level due to poor impedance matching revealed by  $|Z_{in}/Z_0|$ . The  $|Z_{in}/Z_0|$  value of Ni/OMCN-D was nearest to 1 at 12.0 and 14.3 GHz. Interestingly, Ni/OMCN-D showed an extremely high RL value of -72.2 dB at 14.3 GHz, whereas RL intensify at 12.0 GHz was comparatively low because of the inferior dissipation ability verified by the lower  $\alpha$ . From the above result, it was good impedance matching and sufficient dissipation capability that synergistically determine excellent EMWA properties.

**Table S1.** Physicochemical properties of the samples.

| Sample    | $S_{\text{BET}}$ ( $\text{m}^2 \text{g}^{-1}$ ) | $V_{\text{total}}$ ( $\text{cm}^3 \text{g}^{-1}$ ) | $D_{\text{pore}}$ (nm) | $I_{\text{D}}/I_{\text{G}}$ | N content (wt%) |
|-----------|-------------------------------------------------|----------------------------------------------------|------------------------|-----------------------------|-----------------|
| OMCN-D    | 313                                             | 0.21                                               | 8.9                    | 0.98                        | 3.2             |
| OMCN-S    | 309                                             | 0.32                                               | 9.6                    | 0.98                        | 2.9             |
| Ni/OMCN-D | 395                                             | 0.43                                               | 9.7                    | 1.0                         | 2.5             |
| Ni/OMCN-S | 400                                             | 0.46                                               | 10.3                   | 1.0                         | 2.3             |



**Table S2.** EMWA performance of the relative absorbers.<sup>1-12</sup>

| Sample              | Filler loading<br>(wt %) | RL <sub>max</sub> (dB) | Thickness<br>(mm) | EAB (GHz) | Ref.   |
|---------------------|--------------------------|------------------------|-------------------|-----------|--------|
| NC@NCNTs            | 30                       | -41.5                  | 1.5               | 5.2       | 1      |
| HBN-Co/C            | -                        | -42.3                  | 1.7               | 5.1       | 2      |
| HPCMCs              | 30                       | -60.7                  | 3.2               | 3.9       | 3      |
| NHCS@NiO/Ni         | 12                       | -44.0                  | 1.7               | 4.38      | 4      |
| Ni-SA/HPCF          | 10                       | -53.2                  | 3.5               | 5.0       | 5      |
| NiFe@C@GO           | 30                       | -51.0                  | 2.8               | 3.97      | 6      |
| GMFs                | 10                       | -42.9                  | 4.0               | 5.59      | 7      |
| Co/C                | 40                       | -35.3                  | 2.5               | 5.8       | 8      |
| BLCNs               | 20                       | -45.3                  | 1.5               | 4.2       | 9      |
| NC                  | 9                        | -24.0                  | 1.6               | 6.0       | 10     |
| MCHS                | 20                       | -50.9                  | 3.2               | 5.4       | 11     |
| Fe <sub>3</sub> C@C | 20                       | -57.6                  | 3.95              | 5.0       | 12     |
| Ni/OMCN-D           | 25                       | -72.2                  | 2.0               | 5.6       | Herein |
| Ni/OMCN-S           | 25                       | -47.1                  | 1.9               | 6.2       | Herein |

## References

- 1 D. Liu, Y. Du, P. Xu, F. Wang, Y. Wang, L. Cui, H. Zhao and X. Han, *J. Mater. Chem. A*, 2021, **9**, 5086-5096.
- 2 J. Liang, J. Chen, H. Shen, K. Hu, B. Zhao and J. Kong, *Chem. Mat.*, 2021, **33**, 1789-1798.
- 3 H. Zhao, X. Xu, Y. Wang, D. Fan, D. Liu, K. Lin, P. Xu, X. Han and Y. Du, *Small*, 2020, **16**, 2003407.
- 4 B. Li, Z. Ma, X. Zhang, J. Xu, Y. Chen, X. Zhang and C. Zhu, *Small*, 2023, **19**, 2207197.
- 5 X. Zhang, B. Li, J. Xu, X. Zhang, Y. Shi, C. Zhu, X. Zhang and Y. Chen, *Adv. Funct. Mater.*, 2023, **33**, 2210456.
- 6 Z. Yang, H. Lv and R. Wu, *Nano Res.*, 2016, **9**, 3671-3682.
- 7 C. Chen, J. Xi, E. Zhou, L. Peng, Z. Chen and C. Gao, *Nano-Micro Lett.*, 2017, **10**, 26.
- 8 Y. Lü, Y. Wang, H. Li, Y. Lin, Z. Jiang, Z. Xie, Q. Kuang and L. Zheng, *Acs Appl. Mater. Interfaces*, 2015, **7**, 13604-13611.
- 9 J. Fu, W. Yang, L. Hou, Z. Chen, T. Qiu, H. Yang and Y. Li, *Ind. Eng. Chem. Res.*, 2017, **56**, 11460-11466.
- 10 H. Zhao, Y. Cheng, H. Lv, B. Zhang, G. Ji and Y. Du, *Acs Sustain. Chem. Eng.*, 2018, **6**, 15850-15857.
- 11 Y. Cheng, Z. Li, Y. Li, S. Dai, G. Ji, H. Zhao, J. Cao and Y. Du, *Carbon*, 2018, **127**, 643-652.
- 12 Z. Lou, Y. Li, H. Han, H. Ma, L. Wang, J. Cai, L. Yang, C. Yuan and J. Zou, *Acs Sustain. Chem. Eng.*, 2018, **6**, 15598-15607.
